# Supplementary material for: Enhanced narrow green emission via efficient energy transfer from Eu2+ to Mn2+ in KAl4Ga7O17 for backlit LCD displays
Source: Royal Society of Chemistry journal article supplement (doi:10.1039/d4tc01192a), 2024-01-01
Supplement: d4tc01192a1.pdf [file d4tc01192a1.pdf]

# Supporting Information

## **Enhanced narrow green emission by constructing efficient energy transfer from $\text{Eu}^{2+}$ to $\text{Mn}^{2+}$ in $\text{KAl}_4\text{Ga}_7\text{O}_{17}$ for backlit LCD displays**

Bohua Zhang, Zhentong Lu, Haoran Zhang, Wei Li, Jianle Zhuang, Chaofan Hu,

Yingliang Liu\*, Bingfu Lei\*, and Xuejie Zhang\*

**\*Address correspondence to E-mail:**

tliuyl@scau.edu.cn (Yingliang Liu);

tleibf@scau.edu.cn (Bingfu Lei);

zhangxuejie@scau.edu.cn (Xuejie Zhang)

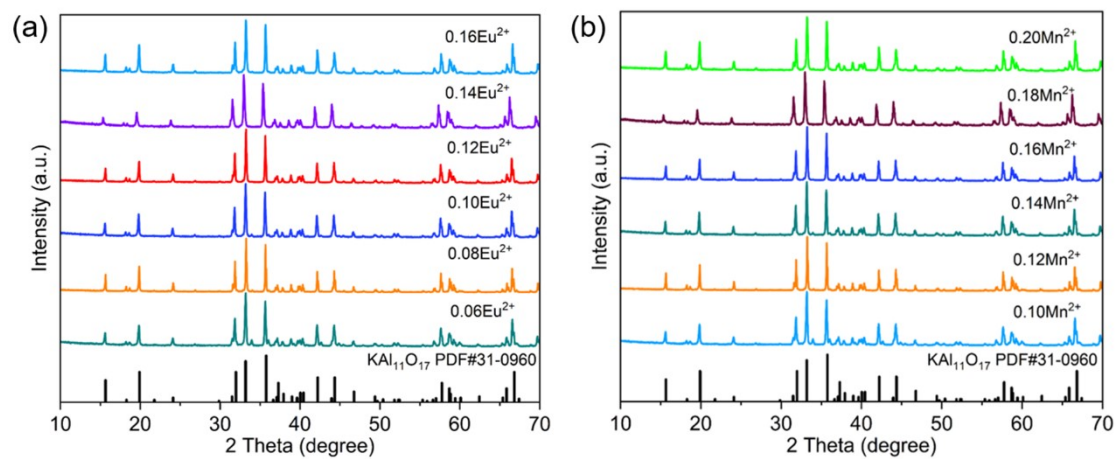

**Fig. S1.** (a) XRD patterns of KAGO:xEu<sup>2+</sup> phosphors; (b) XRD patterns of KAGO:xMn<sup>2+</sup> phosphors.

**Table S1.** Rietveld refinement parameters of KAGO:0.1Eu<sup>2+</sup>,0.12Mn<sup>2+</sup> phosphor

| Compound                 | KAGO:0.1Eu <sup>2+</sup> ,0.12Mn <sup>2+</sup> |
|--------------------------|------------------------------------------------|
| Space Group              | P6 <sub>3</sub> /mmc                           |
| a (Å)                    | 5.6136                                         |
| b (Å)                    | 5.6136                                         |
| c (Å)                    | 22.6663                                        |
| V (Å <sup>3</sup> )      | 618.574                                        |
| $\alpha$ (°)             | 90                                             |
| $\beta$ (°)              | 90                                             |
| $\gamma$ (°)             | 120                                            |
| Z                        | 1                                              |
| 2 $\theta$ -interval (°) | 5-120                                          |
| R <sub>wp</sub> (%)      | 11.56                                          |
| R <sub>p</sub> (%)       | 8.27                                           |

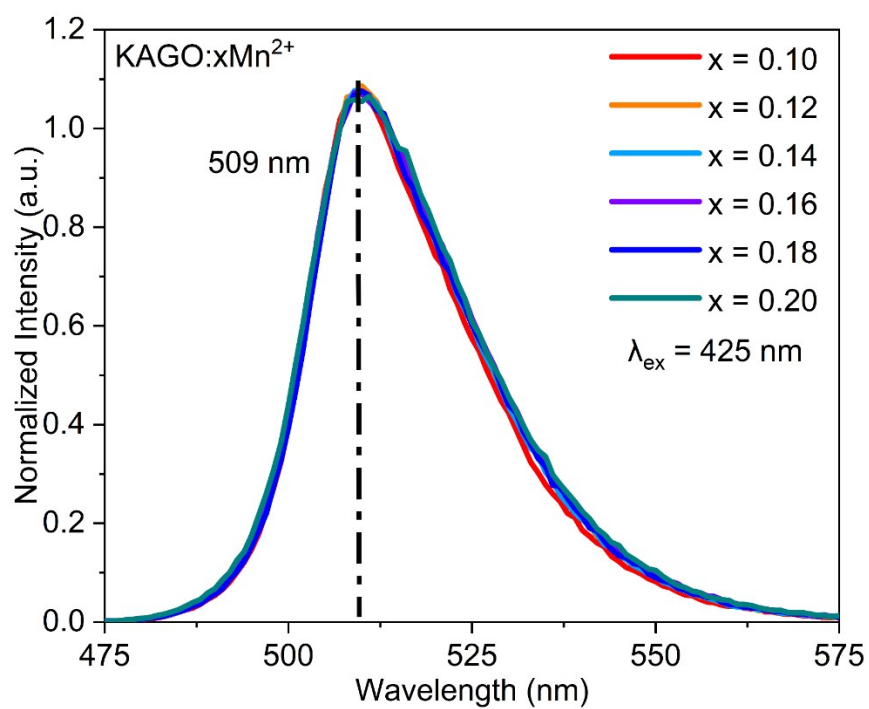

**Fig. S2.** Normalized PL spectra of KAGO:xMn<sup>2+</sup> phosphors.

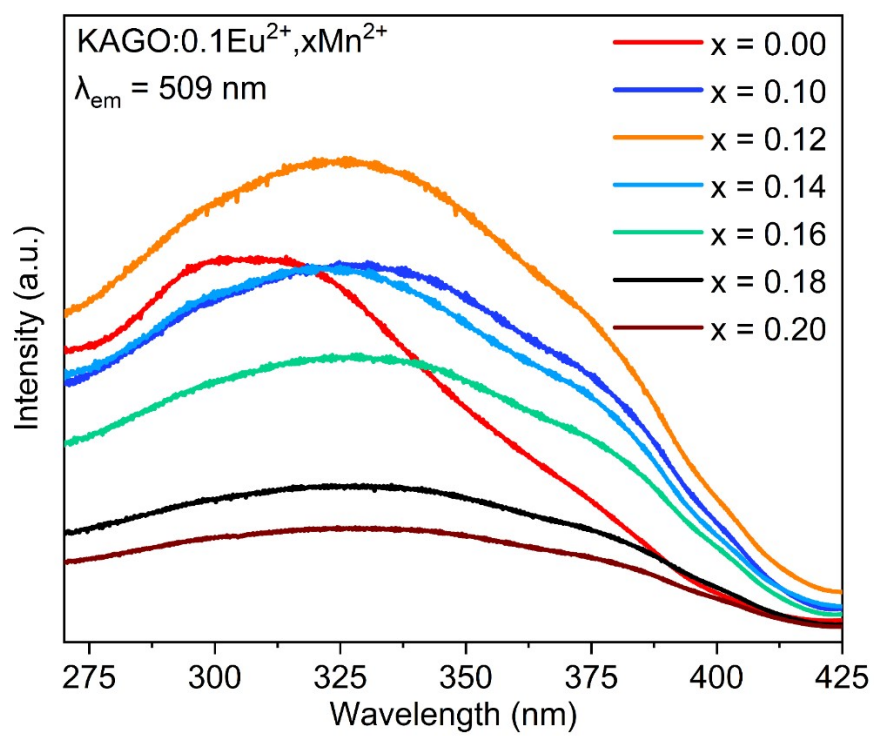

**Fig. S3.** PLE spectra of KAGO:0.1Eu<sup>2+</sup>,xMn<sup>2+</sup> phosphors.

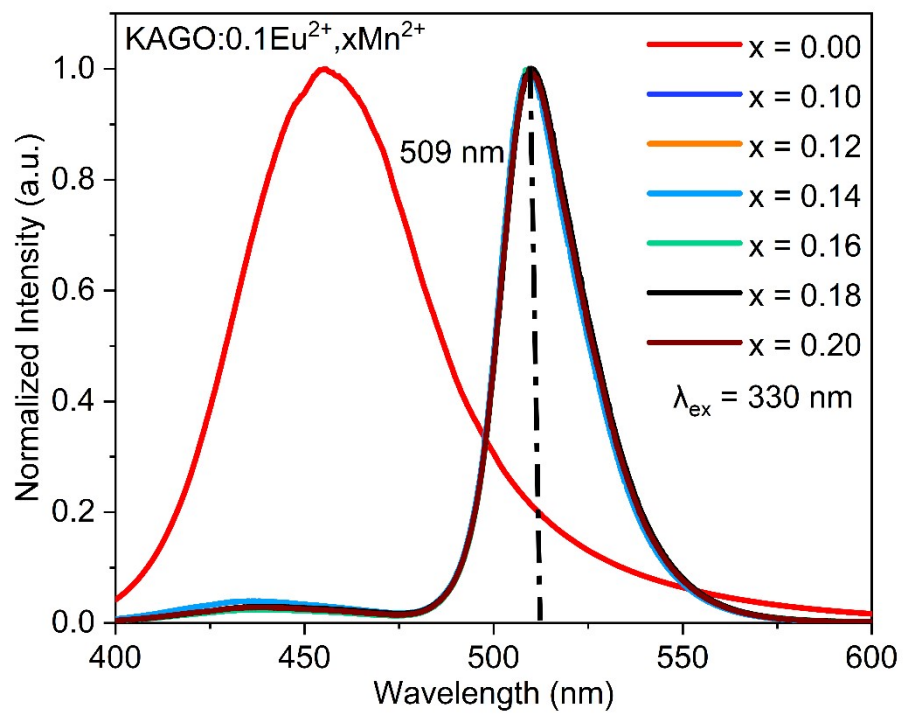

**Fig. S4.** Normalized PL spectra of KAGO:0.1Eu<sup>2+</sup>,xMn<sup>2+</sup> phosphors.

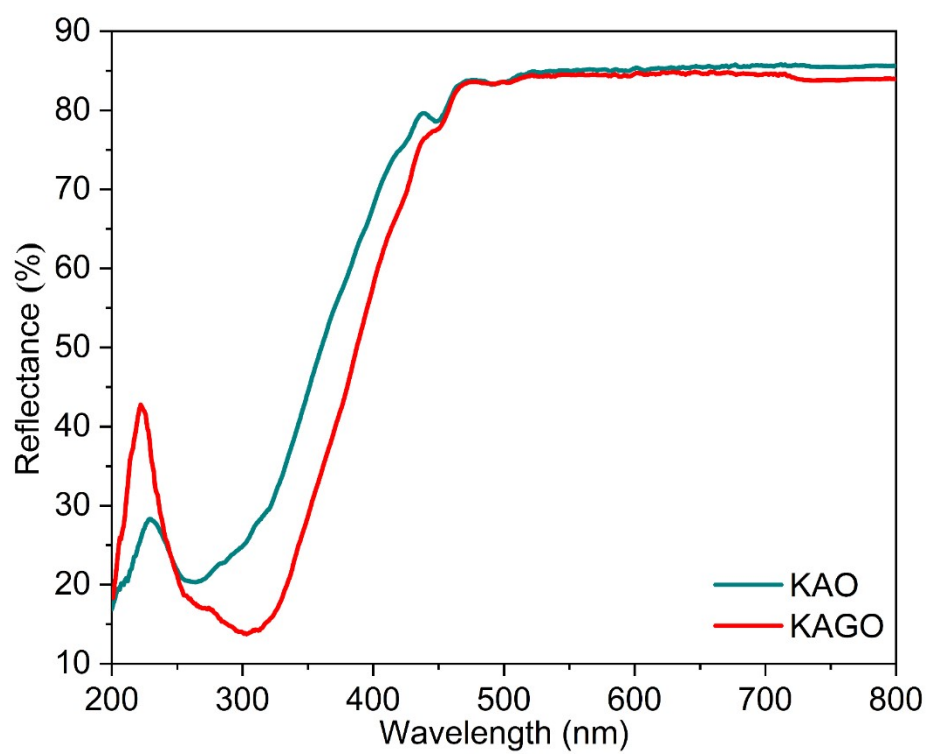

**Fig. S5.** Diffuse reflectance spectra (DRS) of KAO and KAGO matrix.

**Table S2.** The calculated energy transfer (ET) efficiencies of  $\text{Eu}^{2+} \rightarrow \text{Mn}^{2+}$  in of KAGO

| Sample                                         | ET efficiency (%) |
|------------------------------------------------|-------------------|
| KAGO:0.1Eu <sup>2+</sup>                       | 0                 |
| KAGO:0.1Eu <sup>2+</sup> ,0.10Mn <sup>2+</sup> | 95.0              |
| KAGO:0.1Eu <sup>2+</sup> ,0.12Mn <sup>2+</sup> | 95.6              |
| KAGO:0.1Eu <sup>2+</sup> ,0.14Mn <sup>2+</sup> | 95.9              |
| KAGO:0.1Eu <sup>2+</sup> ,0.16Mn <sup>2+</sup> | 96.4              |
| KAGO:0.1Eu <sup>2+</sup> ,0.18Mn <sup>2+</sup> | 96.5              |



**The calculation method of coverage area:**

Firstly, the EL spectrum was collected by using an integrating sphere spectroradiometer system (ATA-1000, Ever fine). Then, the obtained spectra were input into CIE1931 chromaticity coordinate calculation software to obtain the corresponding color coordinates, and the coverage area of color coordinates was calculated by using the following equation:

$$A \text{ or } A_{standard} = \frac{1}{2} \begin{vmatrix} x_R & y_R & 1 \\ x_G & y_G & 1 \\ x_B & y_B & 1 \end{vmatrix}$$

A and A<sub>standard</sub> are the color gamut of the white LED and the standards, respectively. By comparing the coverage area of the white LED with the coverage area of NTSC standard and Rec.2020 standard color coordinates, the calculated color gamut of white LED can cover 122% of the NTSC standard and 91% of the Rec.2020 standard.

**Table S3.** CIE color coordinates of white LED, NTSC standard, and Rec.2020 standard

|       | white LED    | NTSC standard | Rec.2020 standard |
|-------|--------------|---------------|-------------------|
| Red   | (0.69, 0.30) | (0.62, 0.33)  | (0.62, 0.34)      |
| Green | (0.07, 0.69) | (0.21, 0.71)  | (0.17, 0.80)      |
| Blue  | (0.15, 0.02) | (0.14, 0.08)  | (0.13, 0.05)      |
